# Supplementary material for: Heat wave characteristics: evaluation of regional climate model performances for Germany
Source: Copernicus journal article supplement (doi:10.5194/nhess-24-265-2024), 2024-01-31
Supplement: Supplementary file 1 [file nhess-24-265-2024-supplement.pdf]

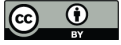

*Supplement of*

## **Heat wave characteristics: evaluation of regional climate model performances for Germany**

**Dragan Petrovic et al.**

*Correspondence to:* Dragan Petrovic ([dragan.petrovic@kit.edu](mailto:dragan.petrovic@kit.edu))

The copyright of individual parts of the supplement might differ from the article licence.

## **Supplementary material**

Additional tables and figures that were omitted in the manuscript for brevity.

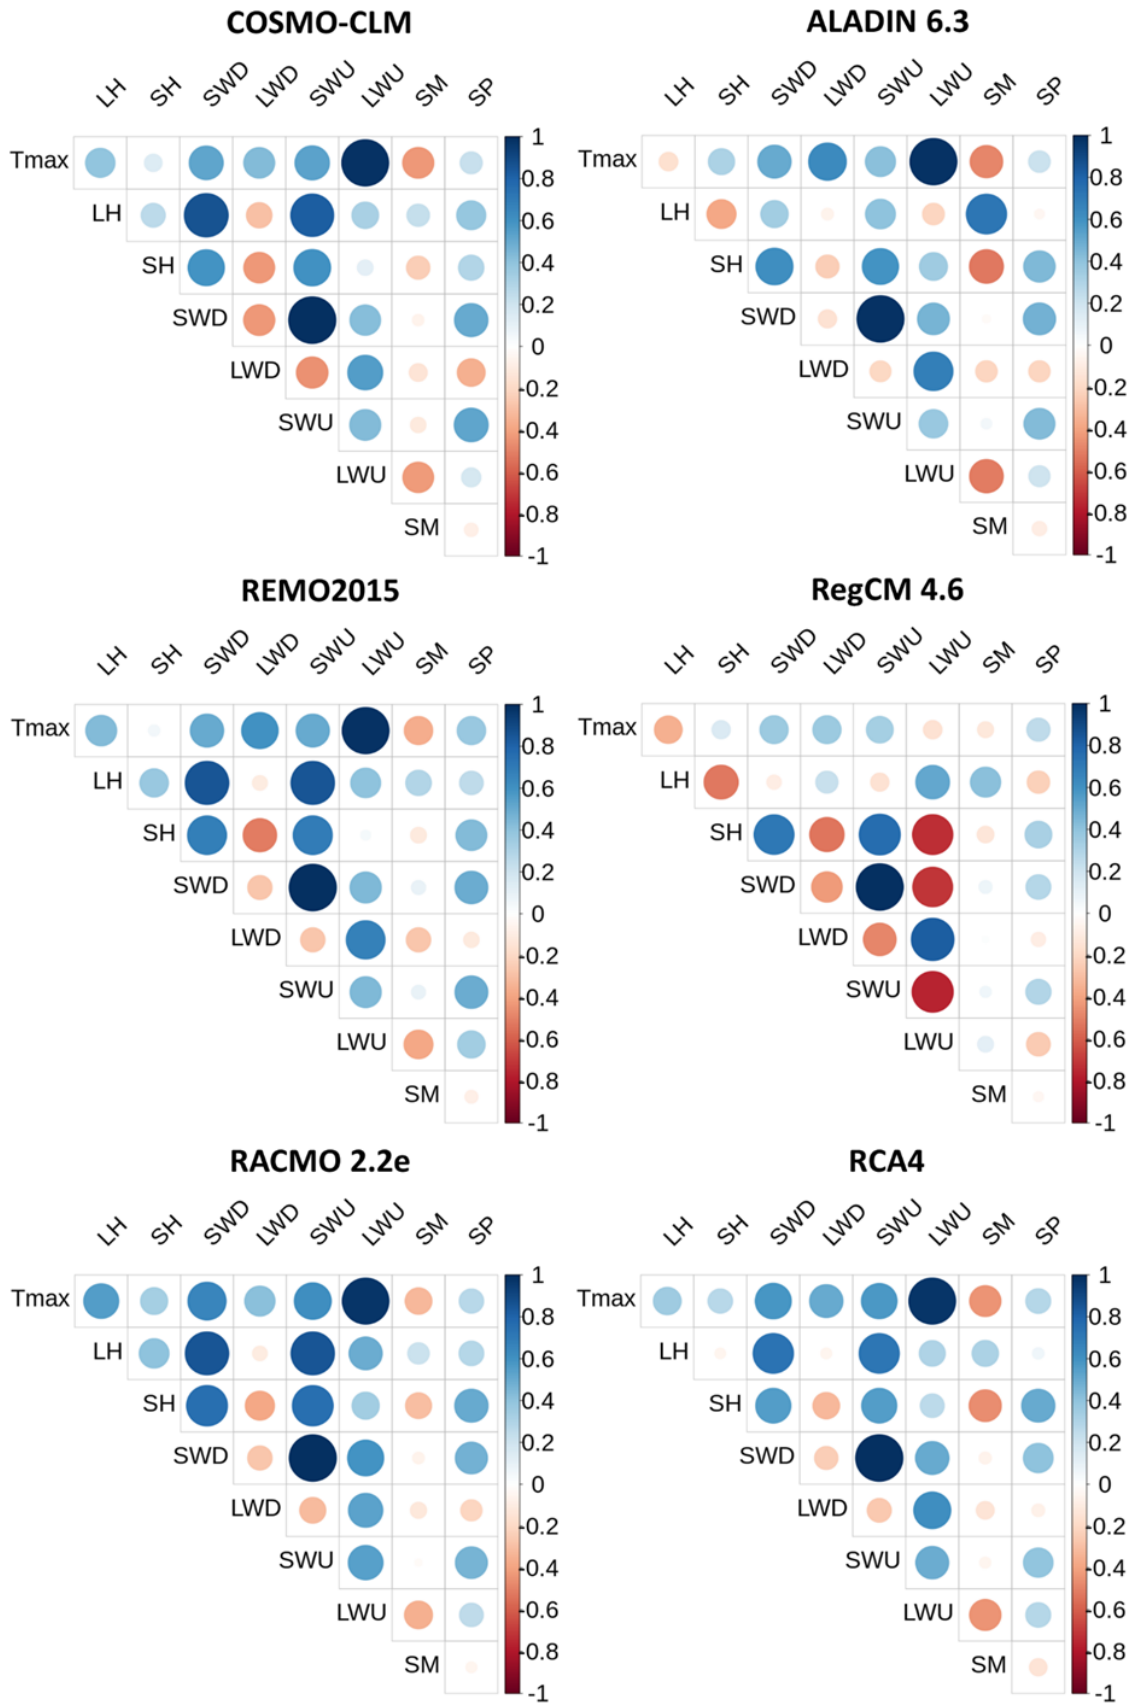

**Figure S1:** Correlation matrices displaying the Pearson correlation of the following variables among each other from the individual EURO-CORDEX RCM outputs: daily maximum temperature (Tmax), latent heat flux (LH), sensible heat flux (SH), shortwave incoming radiation (SWD), longwave incoming radiation (LWD), shortwave outgoing radiation (SWU), longwave outgoing radiation (LWU), soil moisture (sm) and surface pressure (SP). Spatially averaged values of the summer months of the entire study period 1980 – 2009 are considered.

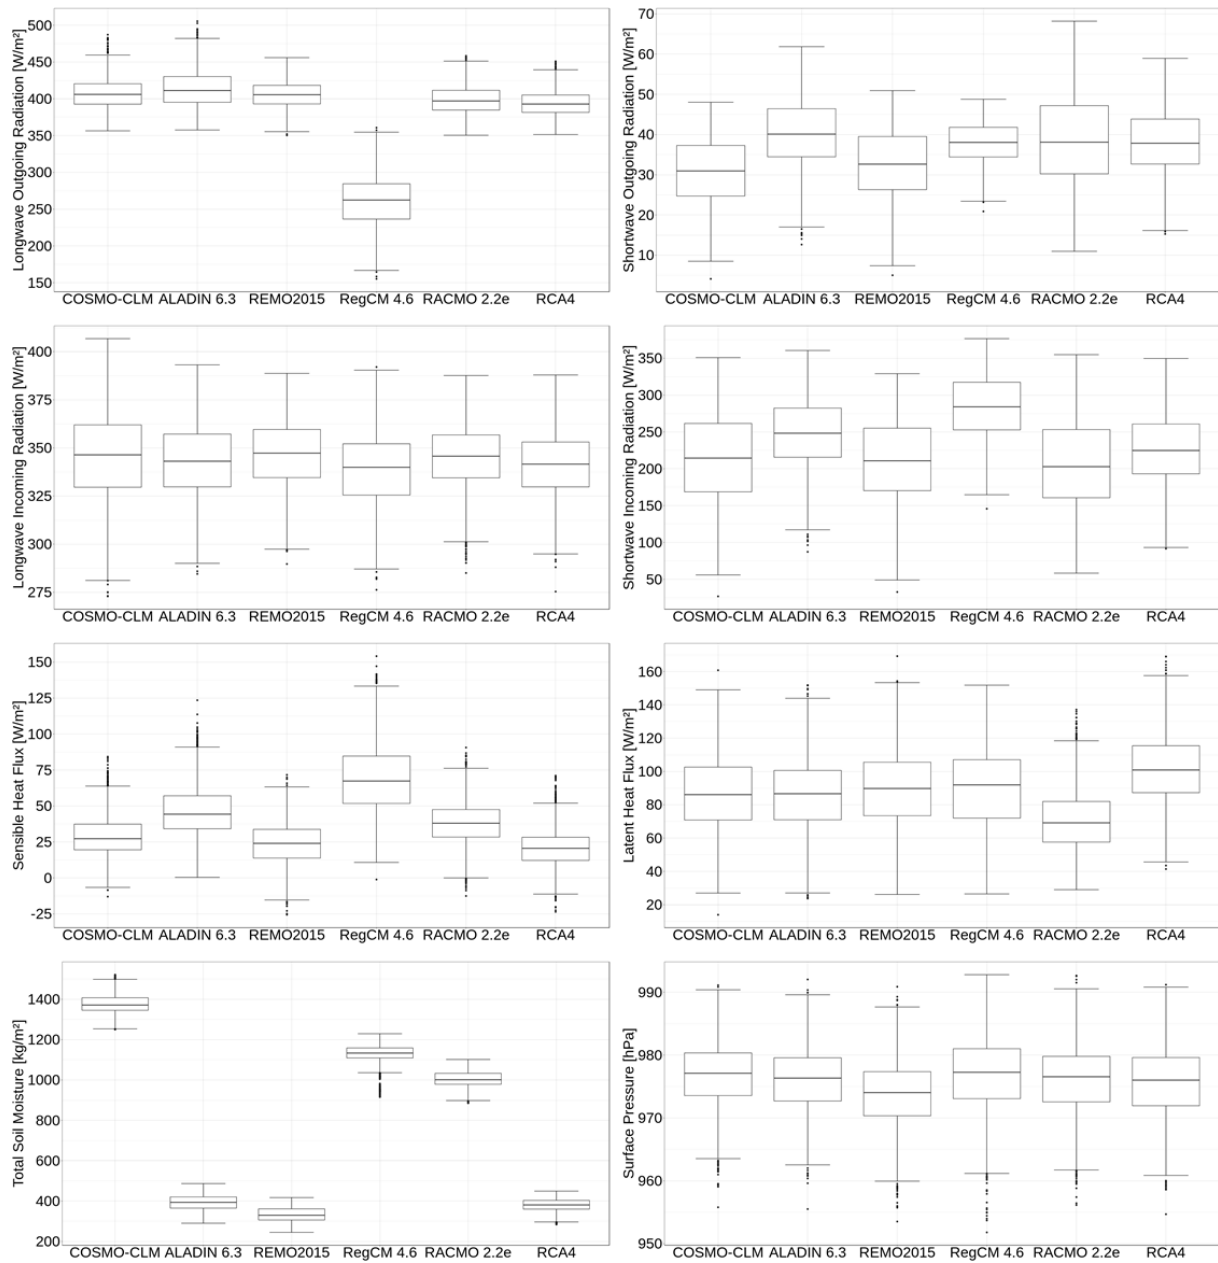

**Figure S2:** Boxplots displaying the distributions of the spatially averaged values of the additional variables retrieved from the individual EURO-CORDEX outputs for the summer months of the entire study period 1980 – 2009.

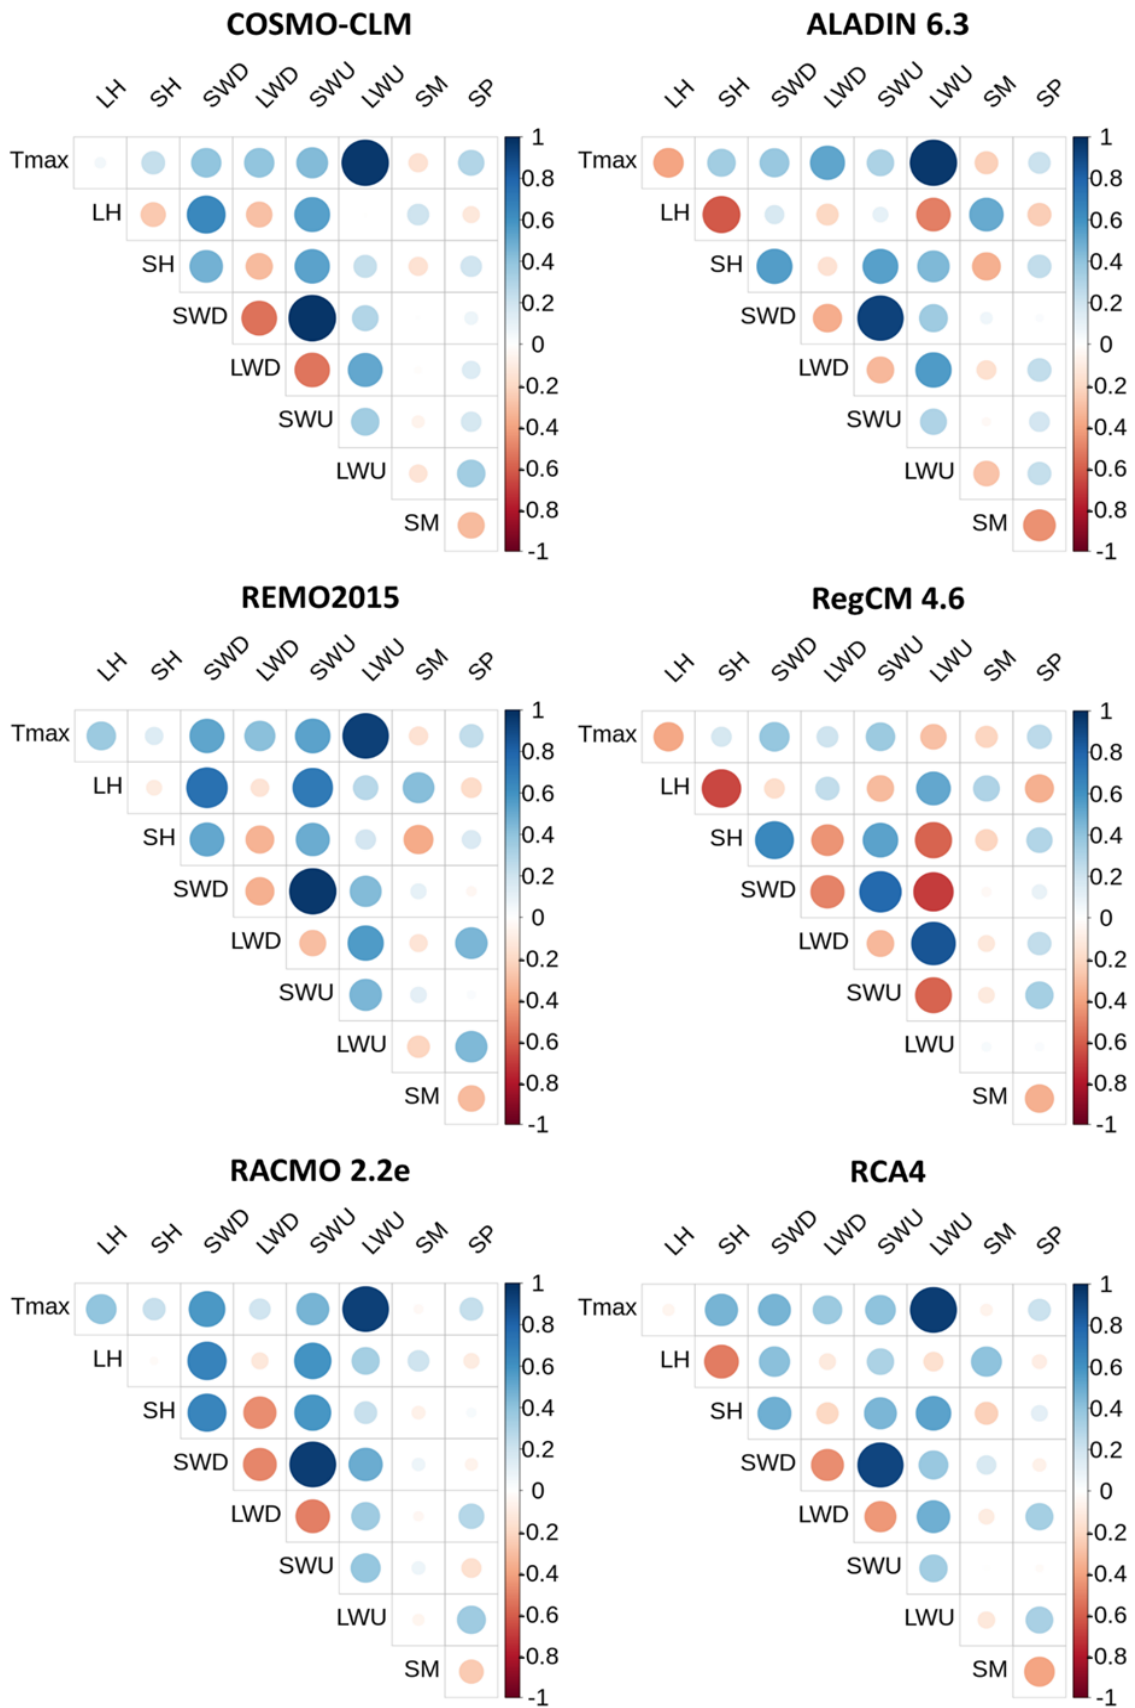

**Figure S3:** Same as Figure S1, but values only considered from the summer period 2003 from all grid cells.

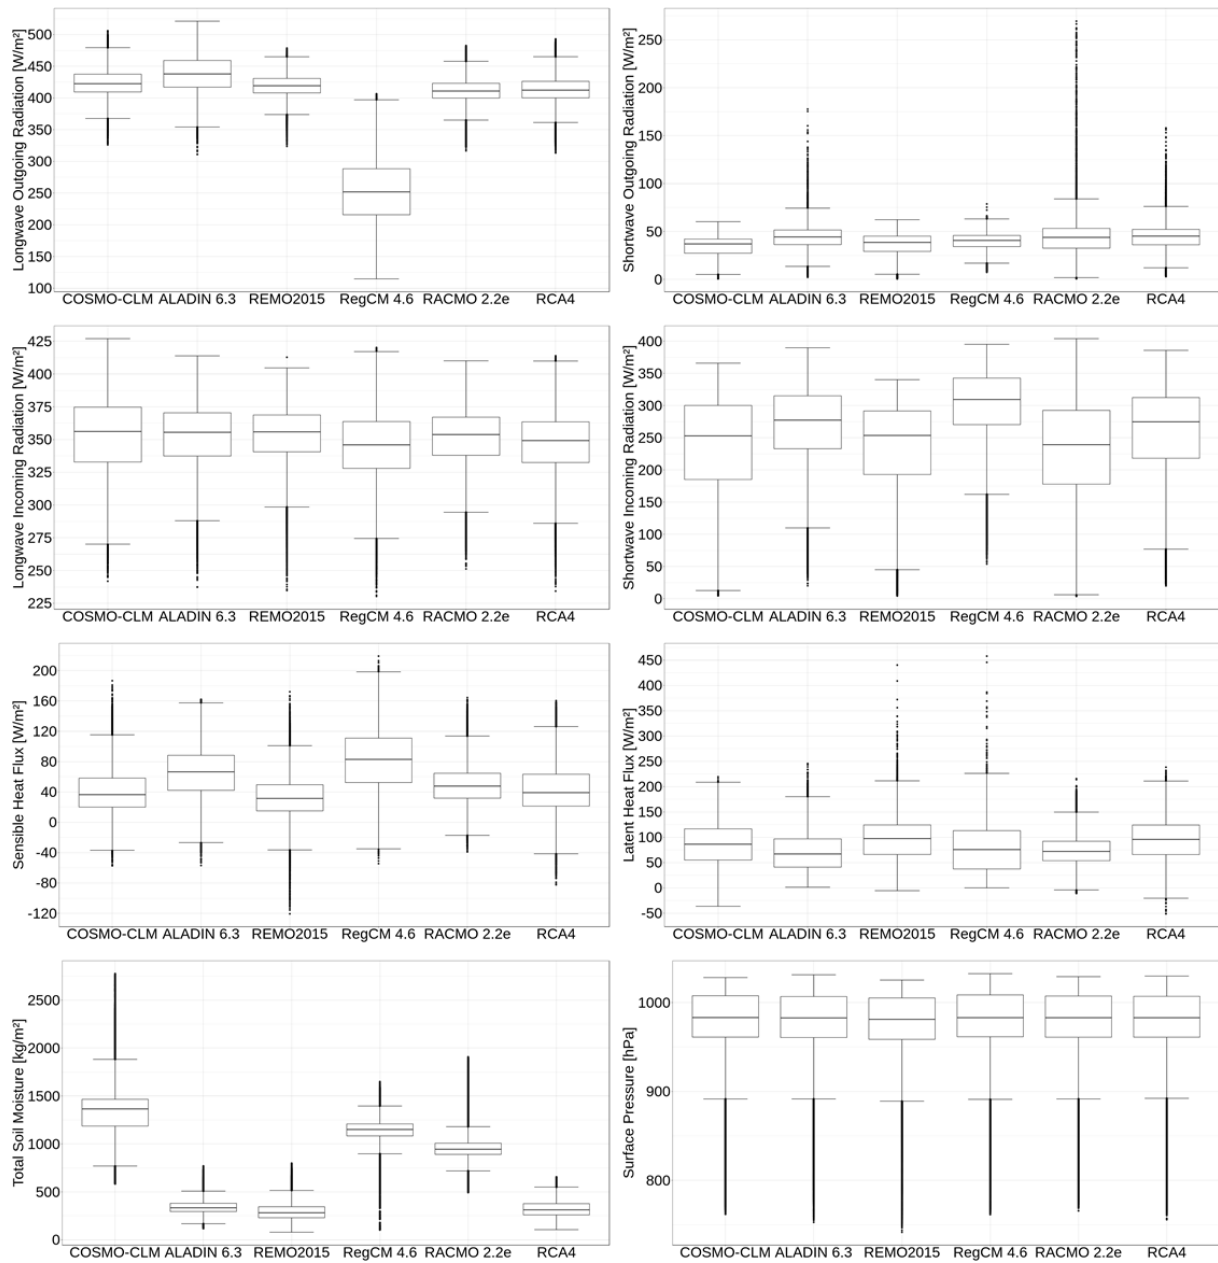

**Figure S4:** Same as Figure S2, but values only considered from the summer period 2003 from all grid cells.

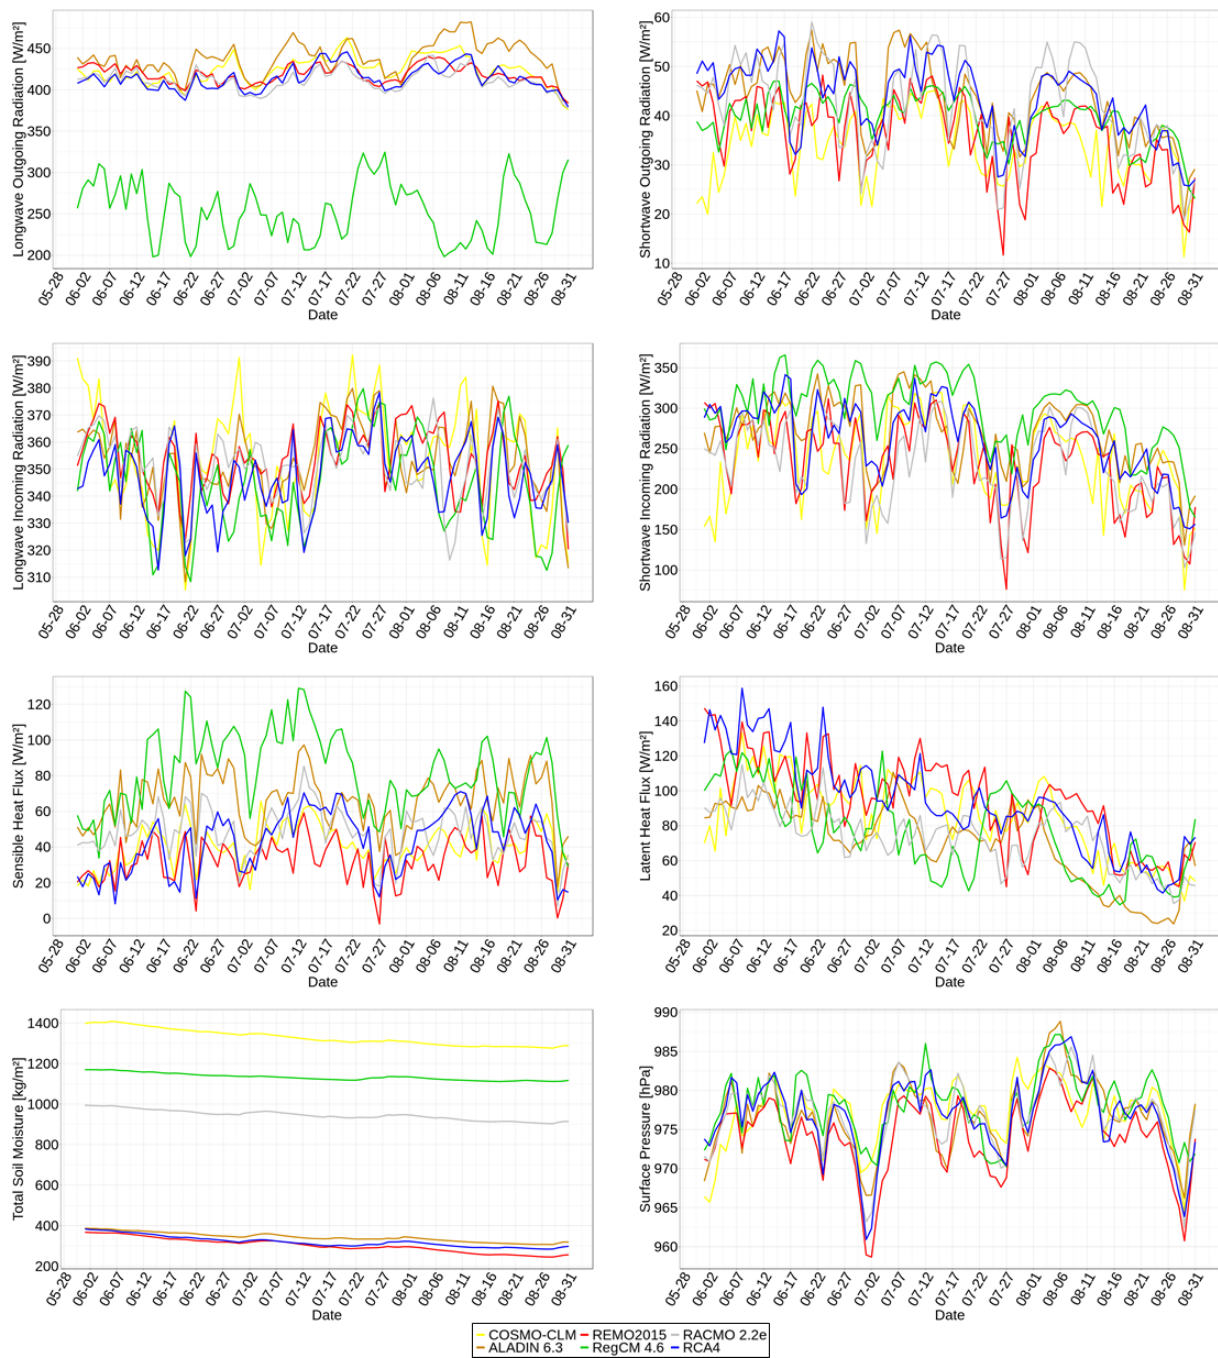

**Figure S5:** Spatially averaged values of the different variables from each EURO-CORDEX RCM over the summer period 2003.
